# Supplementary material for: Invasive Burmese pythons alter host use and virus infection in the vector of a zoonotic virus
Source: PubMed Central journal article supplement (PMC8239020; doi:10.1038/s42003-021-02347-z), 2021-06-28
Supplement: 42003_2021_2347_MOESM2_ESM.pdf [file 42003_2021_2347_MOESM2_ESM.pdf]

Supplementary Table 1. Model parameter estimates ( $\beta$ ), SE's, 95% Confidence intervals (CI), z-values and p-values of models used to explain the variation in relative cotton rat host use and Everglades virus infection rate in vector mosquitoes.

| Models and parameters                                                     | $\beta$ | SE    | Z-value | <i>p</i> | Lower CI | Upper CI |
|---------------------------------------------------------------------------|---------|-------|---------|----------|----------|----------|
| <b>Relative Cotton rat host use</b>                                       |         |       |         |          |          |          |
| Cotton rat activity + Non-rodent diversity                                |         |       |         |          |          |          |
| Cotton rat activity                                                       | 0.17    | 0.07  | 2.37    | 0.018    | 0.03     | 0.31     |
| Non-rodent diversity                                                      | -1.20   | 0.36  | -3.30   | 0.001    | -1.91    | -0.49    |
| Non-rodent activity                                                       |         |       |         |          |          |          |
| Non-rodent activity                                                       | -10.33  | 7.36  | -1.40   | 0.160    | -24.67   | 4.01     |
| Cotton rat activity                                                       |         |       |         |          |          |          |
| Cotton rat activity                                                       | 0.25    | 0.12  | 1.99    | 0.046    | 0.01     | 0.49     |
| Non-rodent activity + Non-rodent diversity                                |         |       |         |          |          |          |
| Non-rodent activity                                                       | 0.51    | 5.77  | 0.09    | 0.929    | -10.74   | 11.76    |
| Non-rodent diversity                                                      | -1.52   | 0.54  | -2.80   | 0.005    | -2.58    | -0.46    |
| Cotton rat activity + Non-rodent activity                                 |         |       |         |          |          |          |
| Cotton rat activity                                                       | 0.22    | 0.12  | 1.88    | 0.060    | -0.01    | 0.45     |
| Non-rodent activity                                                       | -7.86   | 6.23  | -1.26   | 0.207    | -20.00   | 4.29     |
| Non-rodent diversity                                                      |         |       |         |          |          |          |
| Non-rodent diversity                                                      | -1.786  | 0.536 | -3.33   | 0.001    | -2.83    | -0.74    |
| <b>EVEV Infection rate</b>                                                |         |       |         |          |          |          |
| Cotton rat activity + Relative Cotton rat host use                        |         |       |         |          |          |          |
| Cotton rat activity                                                       | -0.19   | 0.11  | -1.74   | 0.082    | -0.40    | 0.02     |
| Relative Cotton rat host use                                              | 4.06    | 1.25  | 3.24    | 0.001    | 1.61     | 6.50     |
| Relative Cotton rat host use                                              |         |       |         |          |          |          |
| Relative Cotton rat host use                                              | 2.95    | 1.37  | 2.16    | 0.031    | 0.29     | 5.61     |
| Cotton rat activity + Relative Cotton rat host use + Non-rodent diversity |         |       |         |          |          |          |
| Cotton rat activity                                                       | -0.19   | 0.11  | -1.71   | 0.087    | -0.41    | 0.03     |
| Relative Cotton rat host use                                              | 3.99    | 1.44  | 2.78    | 0.005    | 1.19     | 6.79     |
| Non-rodent diversity                                                      | -0.59   | 5.88  | -0.10   | 0.921    | -12.06   | 10.89    |
| Non-rodent activity                                                       |         |       |         |          |          |          |
| Non-rodent activity                                                       | -10.39  | 8.05  | -1.29   | 0.197    | -26.10   | 5.31     |
| Non-rodent diversity                                                      |         |       |         |          |          |          |
| Non-rodent diversity                                                      | -0.79   | 0.54  | -1.46   | 0.144    | -1.84    | 0.26     |
| Non-rodent activity + Relative Cotton rat host use                        |         |       |         |          |          |          |
| Non-rodent activity                                                       | -3.00   | 7.46  | -0.40   | 0.687    | -17.55   | 11.54    |
| Relative Cotton rat host use                                              | 2.59    | 1.71  | 1.52    | 0.129    | -0.74    | 5.92     |
| Non-rodent activity + Non-rodent diversity                                |         |       |         |          |          |          |
| Non-rodent activity                                                       | -6.22   | 8.56  | -0.727  | 0.47     | -22.90   | 10.46    |
| Non-rodent diversity                                                      | -0.54   | 0.65  | -0.828  | 0.41     | -1.80    | 0.73     |
| Cotton rat activity + Non-rodent activity                                 |         |       |         |          |          |          |
| Cotton rat activity                                                       | -0.08   | 0.15  | -0.57   | 0.566    | -0.39    | 0.21     |
| Non-rodent activity                                                       | -11.50  | 8.38  | -1.37   | 0.170    | -27.84   | 4.84     |
| Cotton rat activity + Non-rodent diversity                                |         |       |         |          |          |          |
| Cotton rat activity                                                       | -0.08   | 0.13  | -0.57   | 0.569    | -0.33    | 0.18     |
| Non-rodent diversity                                                      | -0.85   | 0.54  | -1.57   | 0.117    | -1.92    | 0.21     |
| Cotton rat activity                                                       |         |       |         |          |          |          |
| Cotton rat activity                                                       | -0.03   | 0.15  | -0.20   | 0.841    | -0.31    | 0.26     |

Supplementary Table 2. Pearson's correlation matrix model variables.

|                                       | Cotton Rat Activity | Non-rodent Activity | Cotton Rat : Other Animal Blood Meals | Non-rodent Diversity | Proportion EVEV Positive Pools |
|---------------------------------------|---------------------|---------------------|---------------------------------------|----------------------|--------------------------------|
| Cotton Rat Activity                   | 1                   | -0.144              | 0.522                                 | -0.189               | -0.109                         |
| Non-rodent Activity                   | -0.144              | 1                   | -0.513                                | 0.555                | -0.458                         |
| Cotton Rat : Other Animal Blood Meals | 0.522               | -0.513              | 1                                     | -0.797               | 0.566                          |
| Non-rodent Diversity                  | -0.189              | 0.555               | -0.797                                | 1                    | -0.561                         |
| Proportion EVEV Positive Pools        | -0.109              | -0.458              | 0.566                                 | -0.561               | 1                              |

Supplementary Figure 1. Model residuals relative cotton rat host use and EVEV infection rate versus longitude (left panels) and distance (right panels).

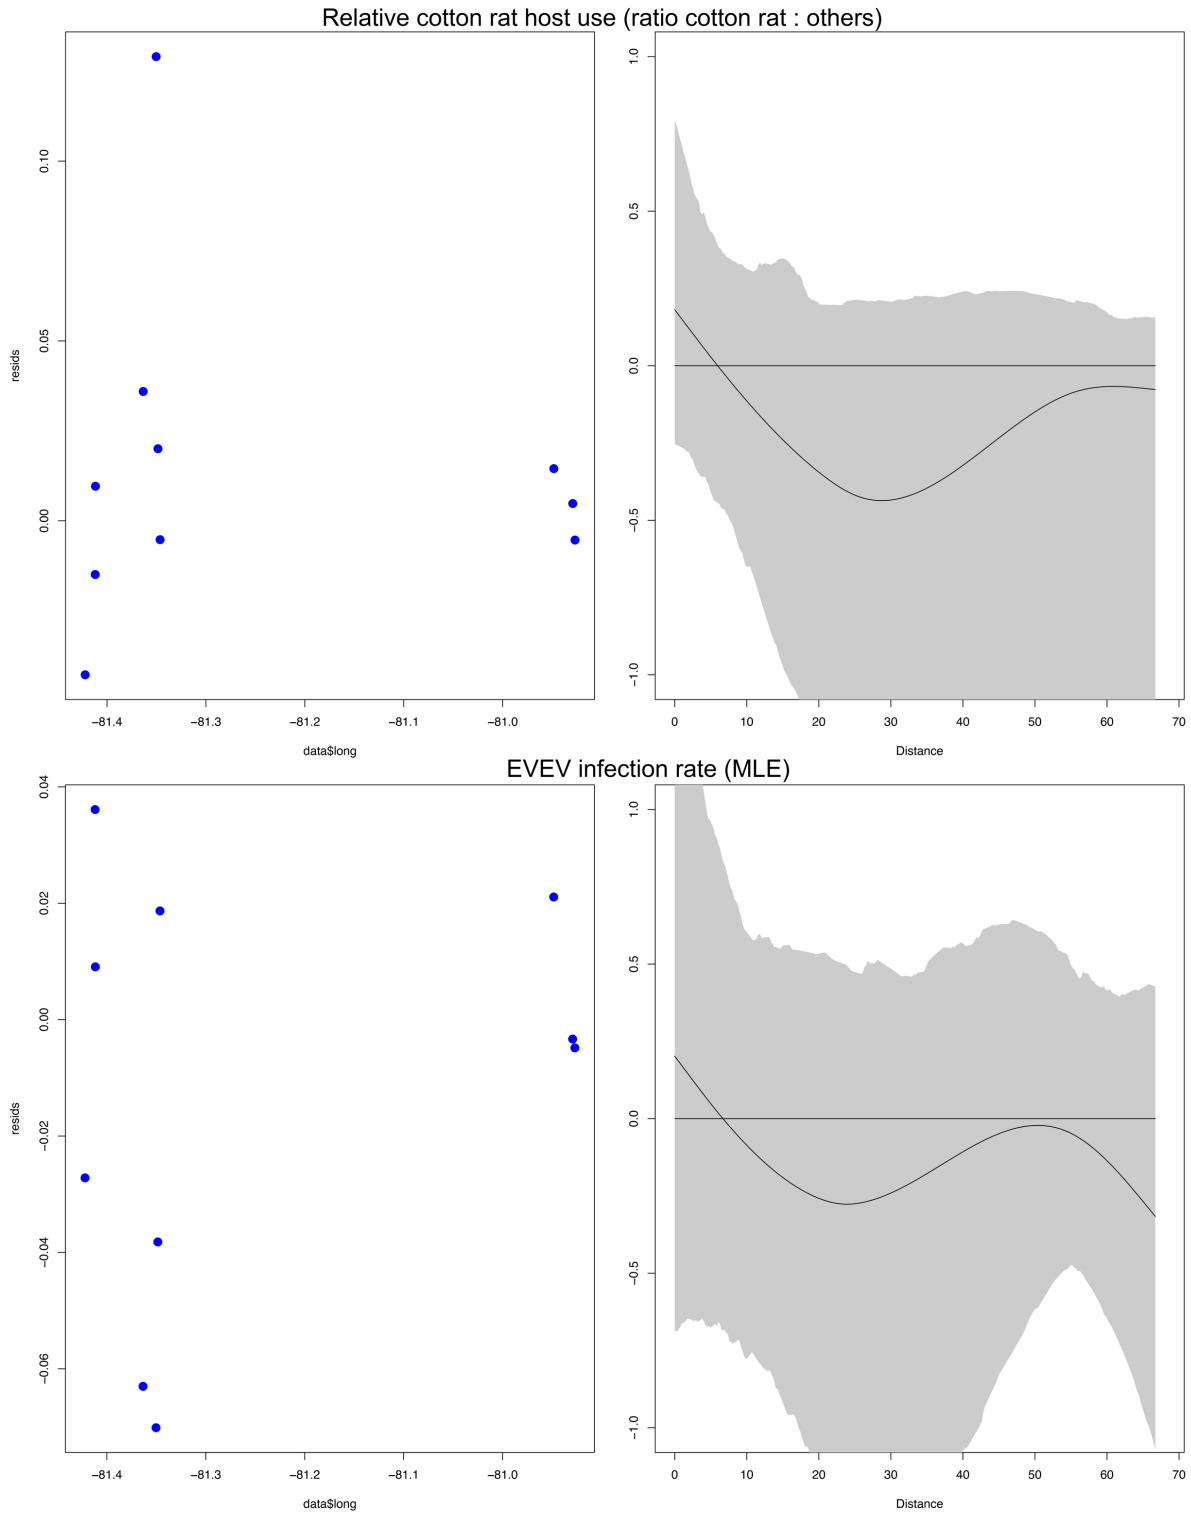

Supplementary Figure 2. Burmese python occurrence records used in species distribution models. Georeferenced points (yellow dots) were restricted to the years 2014 to 2017 and downloaded from the Early Detection and Distribution Mapping Systems (EDDMapS) repository (<https://www.eddmaps.org>).

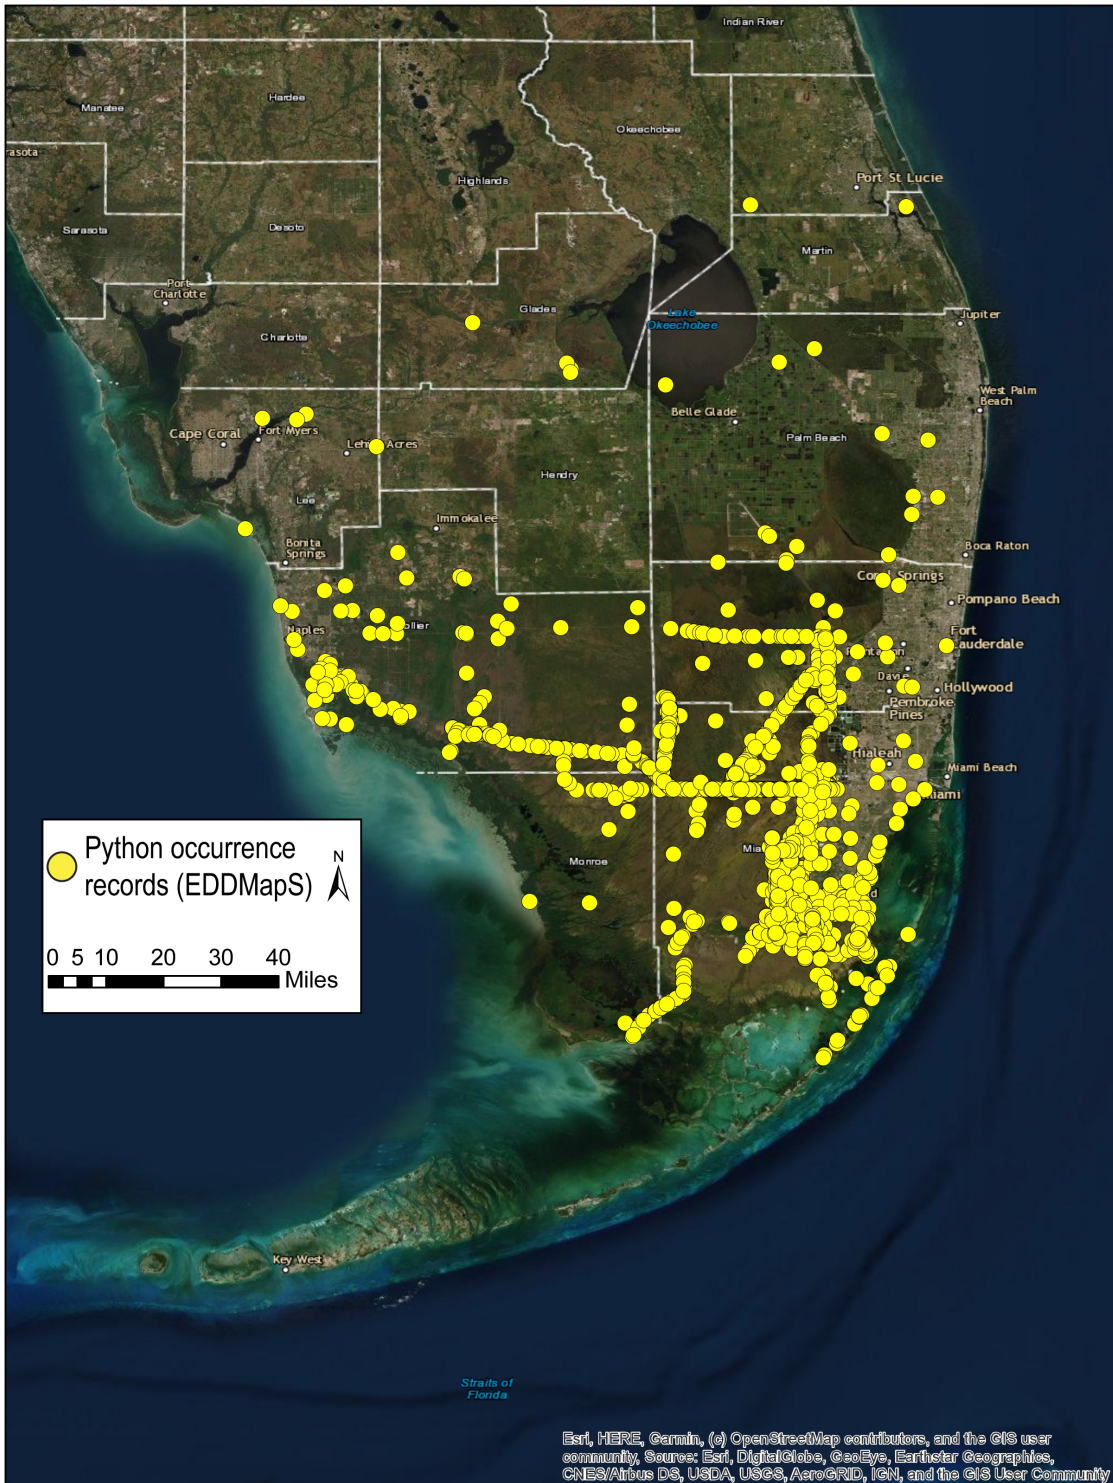

Supplementary Table 3. Sequences and combinations of primers used for conventional RT-PCR for Alphavirus screening and sequencing of EVEV E1 gene. Cycling temperatures for step 2 of the 35 cycle repeats of the cDNA amplification step are listed by primer set. Fluorochrome and Quencher for P2 were ATTO425 and BHQ1/LNA.

| <b>Alphavirus screening</b>       | <b>Primer Name</b> | <b>Sequence</b>                  |                       |
|-----------------------------------|--------------------|----------------------------------|-----------------------|
|                                   | F2A                | ATGATGAARTCIGGIATGTTYT           |                       |
|                                   | R2A                | ATYTTIACTTCCATGTTTCCATCCA        |                       |
|                                   | R3A                | ATYTTIACTTCCATRITTCARCCA         |                       |
|                                   | R4A                | ATYTTIACTTCCATGTTGACCCA          |                       |
|                                   | P2                 | AT + GTT + GTC + GT + CIC + CIAT |                       |
| <b>Sequencing of EVEV E1 gene</b> | <b>Primer Name</b> | <b>Genome Position (bp)</b>      | <b>Sequence</b>       |
|                                   | Forward 9796       | 9796                             | GAGTCCTTGGACCACCTCTG  |
|                                   | Forward 10279      | 10279                            | AAATCAGAGGATTGCCTTGC  |
|                                   | Forward 10804      | 10804                            | GCCTTGTTTACCAGGGTGTC  |
|                                   | Reverse 10657      | 10657                            | CCTGAGTGTATGGCACATGG  |
|                                   | Reverse 11140      | 11140                            | TTTGGGCATGATACTGTGGA  |
|                                   | Reverse 11327      | 11327                            | CAATCGCCGCAAGTTCTATC  |
|                                   | <b>Set Name</b>    | <b>Forward Primer</b>            | <b>Reverse Primer</b> |
|                                   | Set 2              | Forward 9796                     | Reverse 10657         |
|                                   | Set 4              | Forward 10279                    | Reverse 11140         |
|                                   | Set 6              | Forward 10804                    | Reverse 11327         |
|                                   | Set 7              | Forward 9796                     | Reverse 11327         |

Supplementary Table 4. Polymerase chain reaction primers used in host blood meal identification.

| <b>Host Group</b>  | <b>Primer Name</b> | <b>Sequence</b>                    | <b>Amplicon size (bp)</b> |
|--------------------|--------------------|------------------------------------|---------------------------|
| Mammal / amphibian | L2513              | 5'-GCCTGTTTACCAAAAACATCAC-3'       | 300                       |
|                    | H2714              | 5'-CTCCATAGGGTCTTCTCGTCTT-3'       |                           |
| Avian              | L0                 | 5'-GGACAAATATCATTCTGAGG-3'         | 220                       |
|                    | H1                 | 5'-GGGTGGAATGGGATTTTGTC-3'         |                           |
| Reptile            | 16L1               | 5'-CTGACCGTGCAAAGGTAGCGTAATCACT-3' | 450                       |
|                    | H3056              | 5'-CTCCGGTCTGAACTCAGATCACGTAGG-3'  |                           |
