# Supplementary material for: Invasive Burmese pythons alter host use and virus infection in the vector of a zoonotic virus
Source: PubMed Central journal article supplement (PMC8239020; doi:10.1038/s42003-021-02347-z), 2021-06-28
Supplement: 42003_2021_2347_MOESM3_ESM.pdf [file 42003_2021_2347_MOESM3_ESM.pdf]

## **Description of Additional Supplementary Files**

File Name: Supplementary Data 1

Description: Host use of *Culex cedecei* from Florida, USA 2017. Vertebrate hosts of female mosquitoes determined by PCR and sequencing targeting conserved genes. Female mosquitoes were collected using artificial resting shelters (RT) and carbon dioxide-baited light traps (LT) at areas spanning a range of mammal communities and Burmese python abundances.

File Name: Supplementary Data 2

Description: Everglades virus infection in *Culex cedecei* from Florida, USA 2017. Pools of female mosquitoes were screened (mean pool size = 24.2 females) by RT-qPCR assay targeting non-structural protein 4. Female mosquitoes were collected using artificial resting shelters and baited light traps at areas spanning a range of mammal communities and Burmese python abundances.
